# Supplementary material for: 3,5-Diformyl-borondipyrromethene for selective detection of cyanide anion
Source: Royal Society of Chemistry journal article supplement (doi:10.1039/c2an36407g), 2012-10-25
Supplement: c2an36407g.pdf [file c2an36407g.pdf]

### 3, 5-Diformyl-Borondipyrromethene for Selective Detection of Cyanide Anion

Sheri Madhu<sup>a</sup>, Santanu Kumar Basu<sup>b</sup>, Sameer Jadhav<sup>b</sup> and Mangalampalli Ravikanth<sup>a\*</sup>

<sup>a</sup>Department of Chemistry, Indian Institute of Technology Bombay, Powai,  
Mumbai, 400 076, India. E-mail: [ravikanth@chem.iitb.ac.in](mailto:ravikanth@chem.iitb.ac.in)

<sup>b</sup>Department of Chemical Engineering, Indian Institute of Technology Bombay, Powai,  
Mumbai, 400 076, India.

| Entry | Contents                                                                                                       | Page no    |
|-------|----------------------------------------------------------------------------------------------------------------|------------|
| 1     | <b>Figure 1.</b> <sup>1</sup> H NMR spectrum of compound <b>4</b>                                              | <b>S1</b>  |
| 2     | <b>Figure 2.</b> <sup>13</sup> C NMR spectrum of compound <b>4</b>                                             | <b>S2</b>  |
| 3     | <b>Figure 3.</b> HRMS spectrum of compound <b>4</b>                                                            | <b>S3</b>  |
| 4     | <b>Figure 4.</b> <sup>1</sup> H NMR spectrum of compound <b>5</b>                                              | <b>S4</b>  |
| 5     | <b>Figure 5.</b> <sup>13</sup> C NMR spectrum of compound <b>5</b>                                             | <b>S5</b>  |
| 6     | <b>Figure 6.</b> <sup>11</sup> B NMR spectrum of compound <b>5</b>                                             | <b>S6</b>  |
| 7     | <b>Figure 7.</b> <sup>19</sup> F NMR spectrum of compound <b>5</b>                                             | <b>S7</b>  |
| 8     | <b>Figure 8.</b> HRMS spectrum of compound <b>5</b>                                                            | <b>S8</b>  |
| 9     | <b>Figure 9.</b> <sup>1</sup> H NMR spectrum of compound <b>3</b>                                              | <b>S9</b>  |
| 10    | <b>Figure 10.</b> <sup>13</sup> C NMR spectrum of compound <b>3</b>                                            | <b>S10</b> |
| 11    | <b>Figure 11.</b> <sup>19</sup> F NMR spectrum of compound <b>3</b>                                            | <b>S11</b> |
| 12    | <b>Figure 12.</b> <sup>11</sup> B NMR spectrum of compound <b>3</b>                                            | <b>S12</b> |
| 13    | <b>Figure 13.</b> HRMS spectrum of compound <b>3</b>                                                           | <b>S13</b> |
| 14    | <b>Figure 14.</b> Job's plot for compound <b>1</b>                                                             | <b>S14</b> |
| 15    | <b>Figure 15.</b> Absorption and emission spectra of <b>3</b> with CN <sup>-</sup>                             | <b>S15</b> |
| 16    | <b>Figure 16.</b> Fluorescence change of <b>1</b> by various anions                                            | <b>S16</b> |
| 17    | <b>Figure 17.</b> Emission spectra of <b>1</b> with CN <sup>-</sup> ion in CH <sub>3</sub> CN+H <sub>2</sub> O | <b>S17</b> |

S1

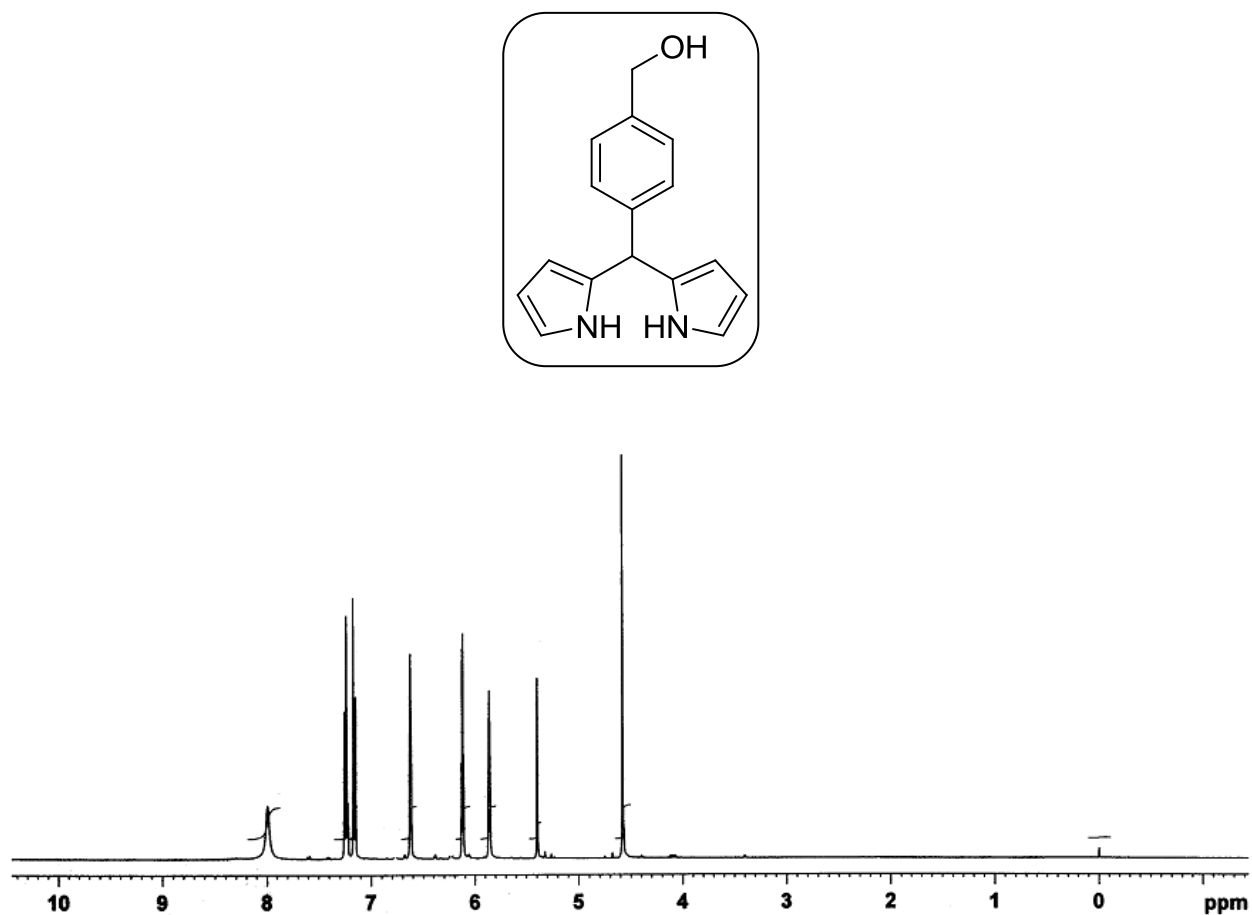

**Figure S1:**  $^1\text{H}$  NMR spectrum of compound **4** recorded in  $\text{CDCl}_3$

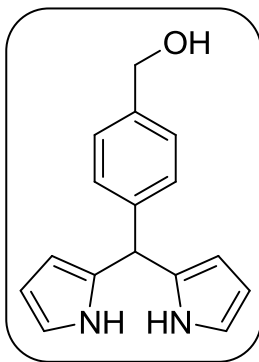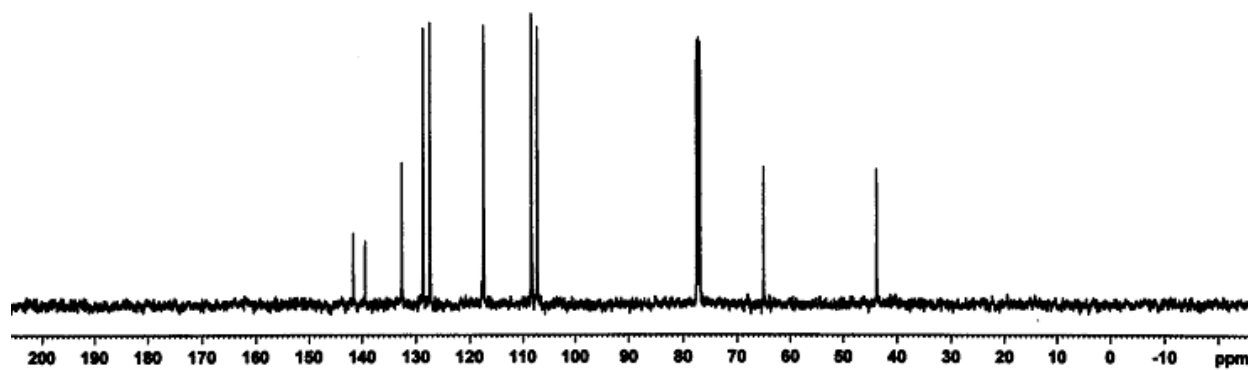

**Figure S2:**  $^{13}\text{C}$  NMR spectrum of compound **4** recorded in  $\text{CDCl}_3$

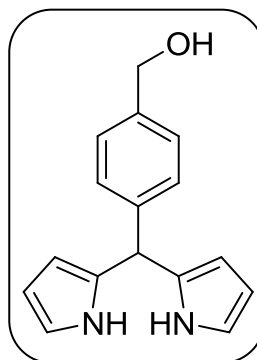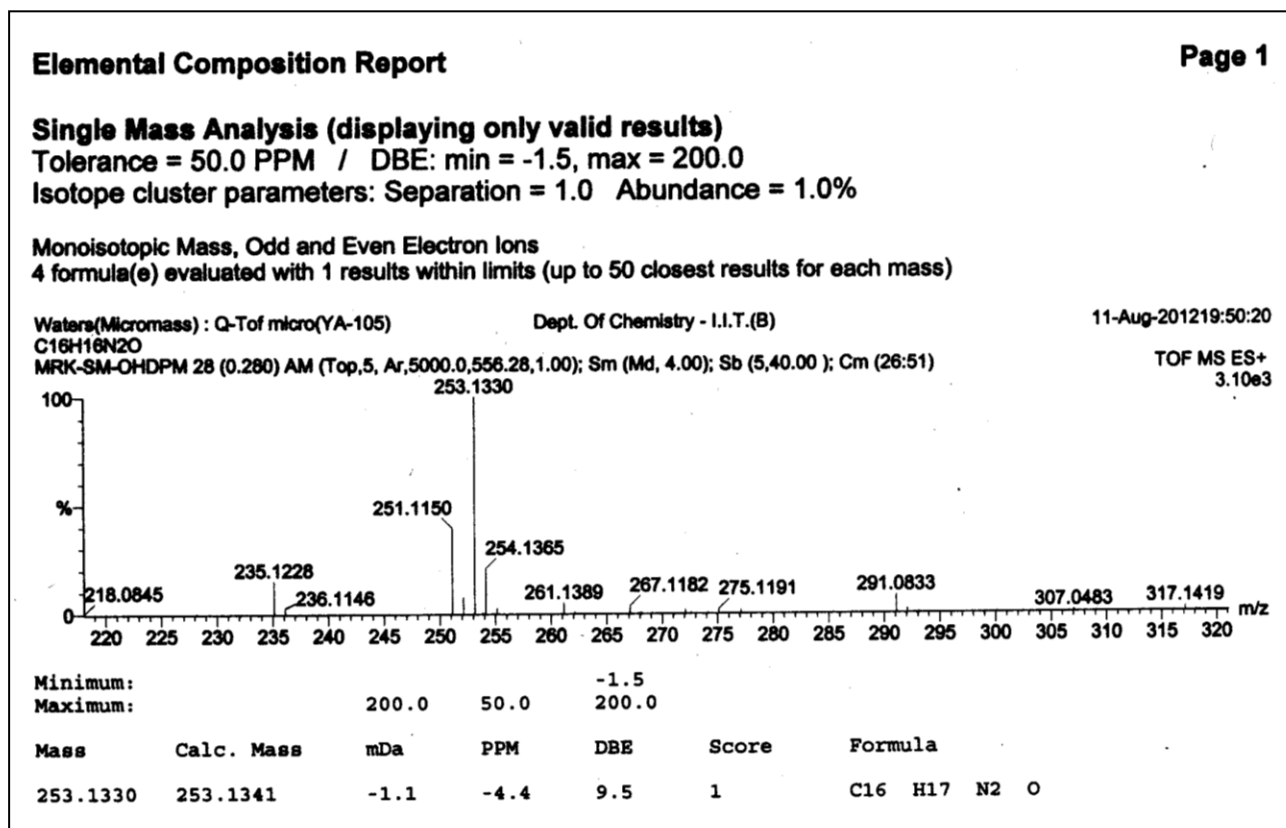

Figure S3: HRMS spectrum of compound 4

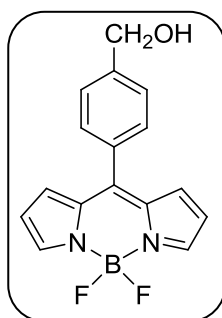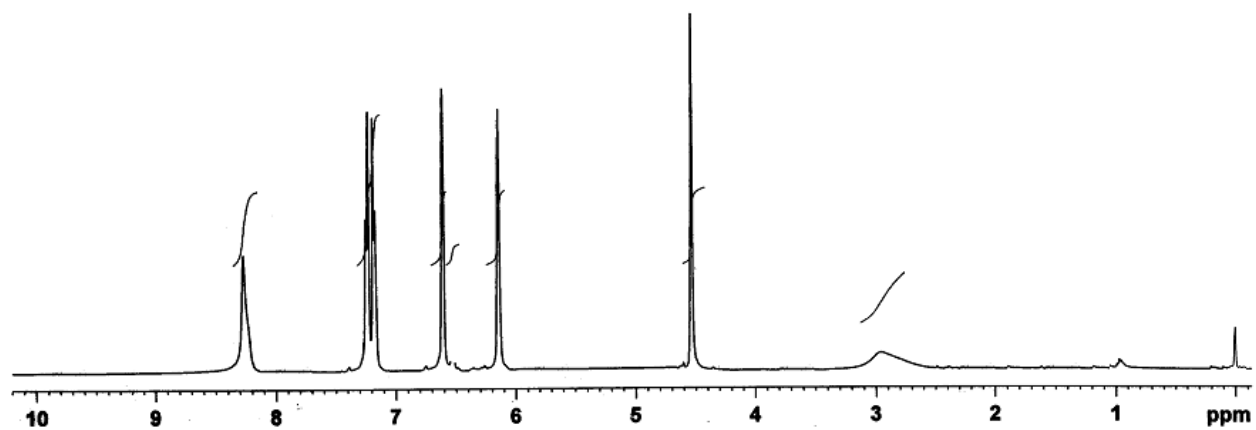

**Figure S4:** <sup>1</sup>H NMR spectrum of compound **5** recorded in CDCl<sub>3</sub>

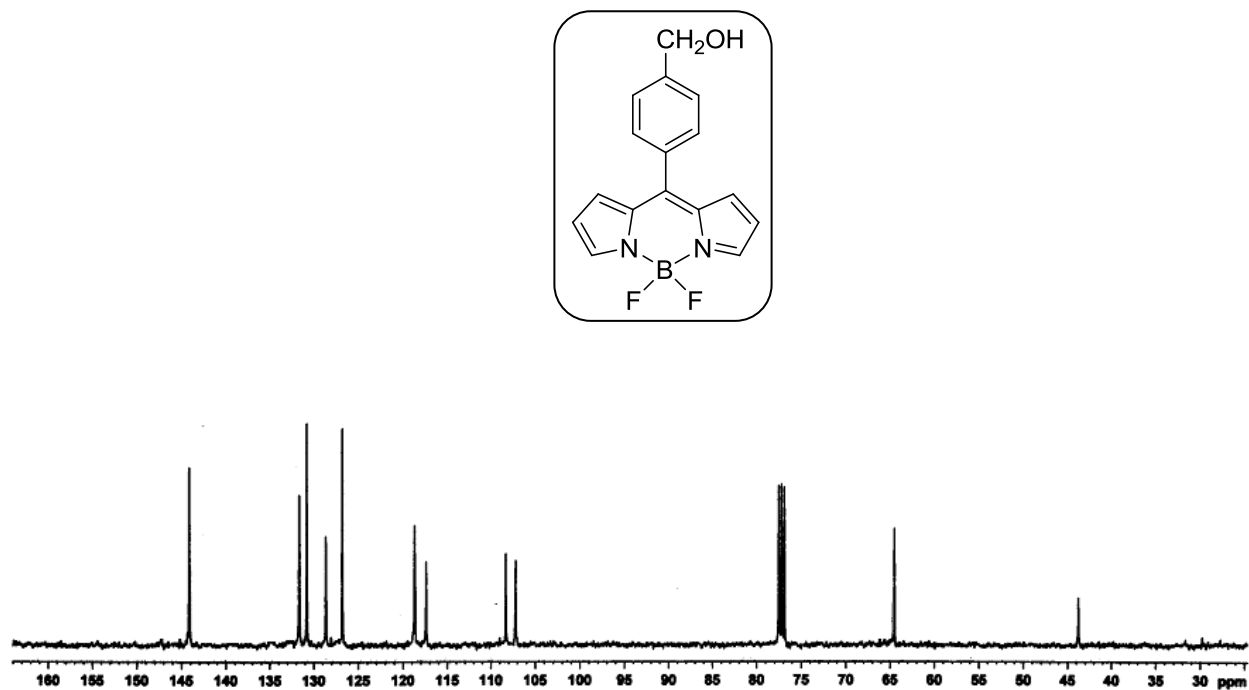

**Figure S5:**  $^{13}\text{C}$  NMR spectrum of compound **5** recorded in  $\text{CDCl}_3$

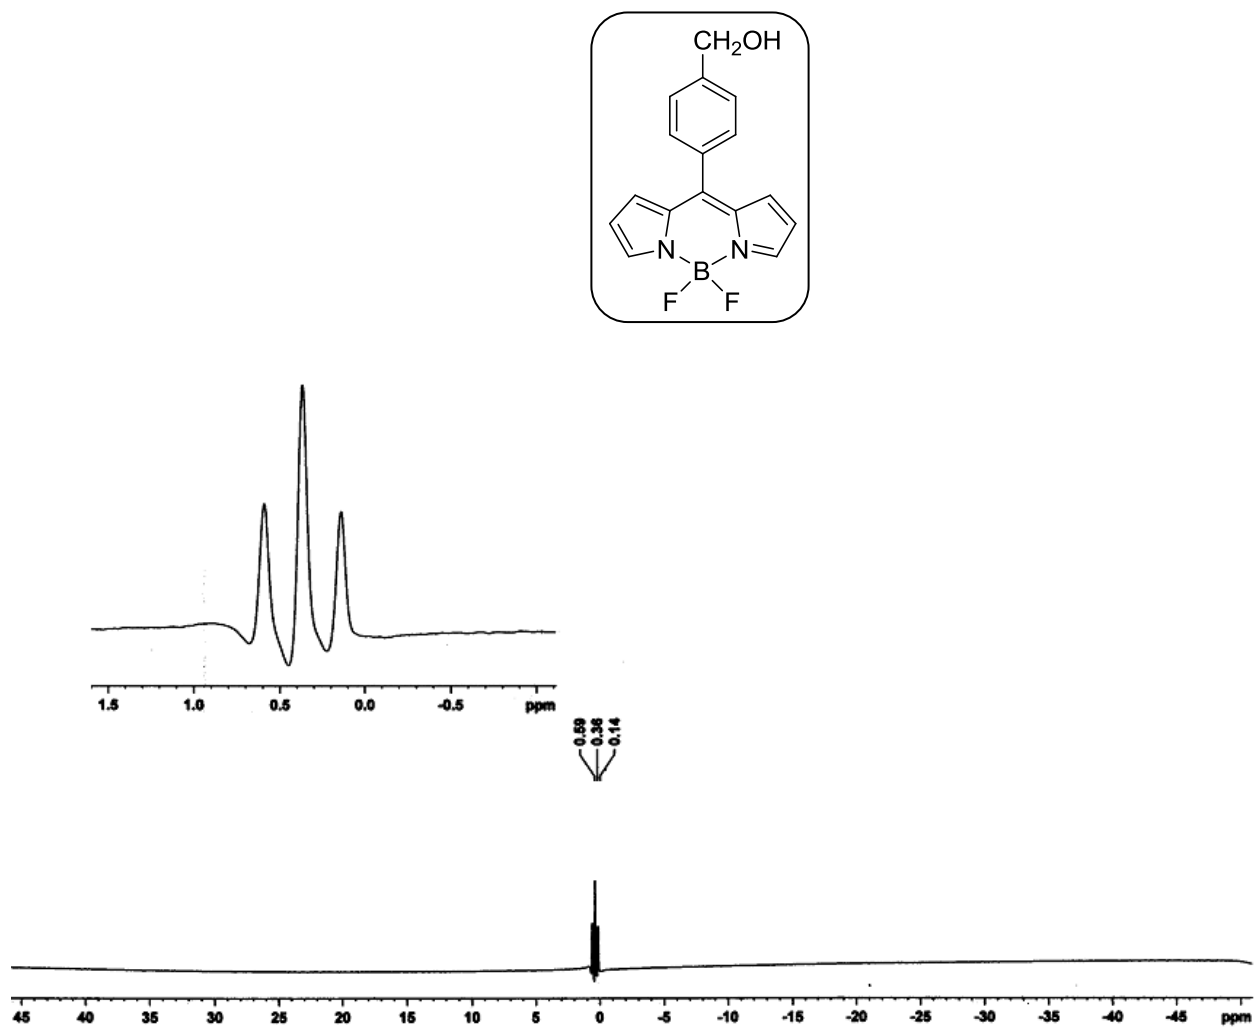

**Figure S6:**  $^{11}\text{B}$  NMR spectrum of compound **5** recorded in  $\text{CDCl}_3$ . Inset shows the expansion

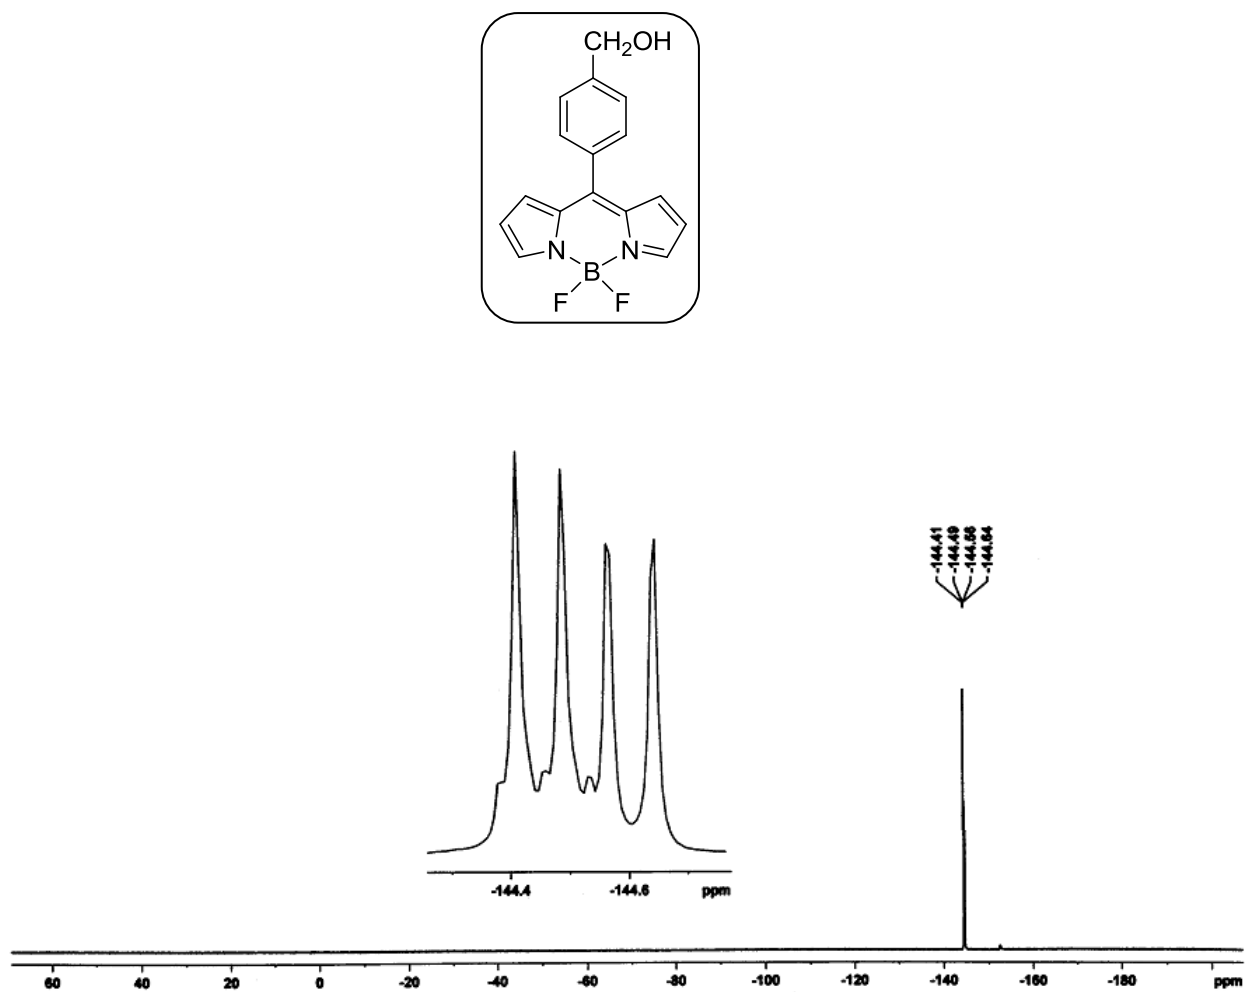

**Figure S7:**  $^{19}\text{F}$  NMR spectrum of compound **5** recorded in  $\text{CDCl}_3$ . Inset shows the expansion



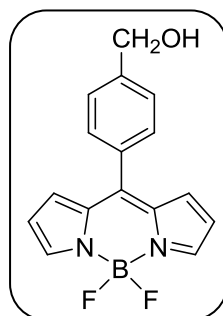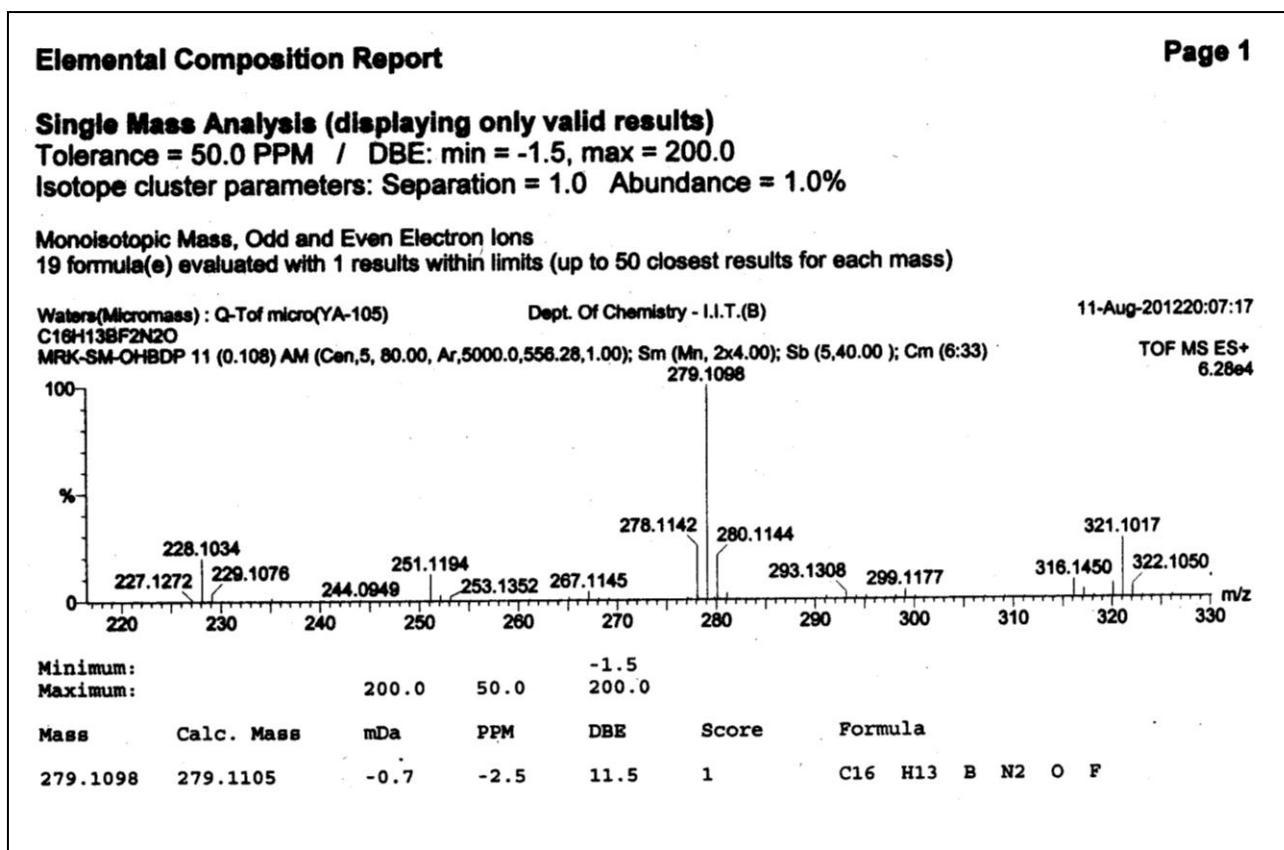

Figure S8: HRMS spectrum of compound 5

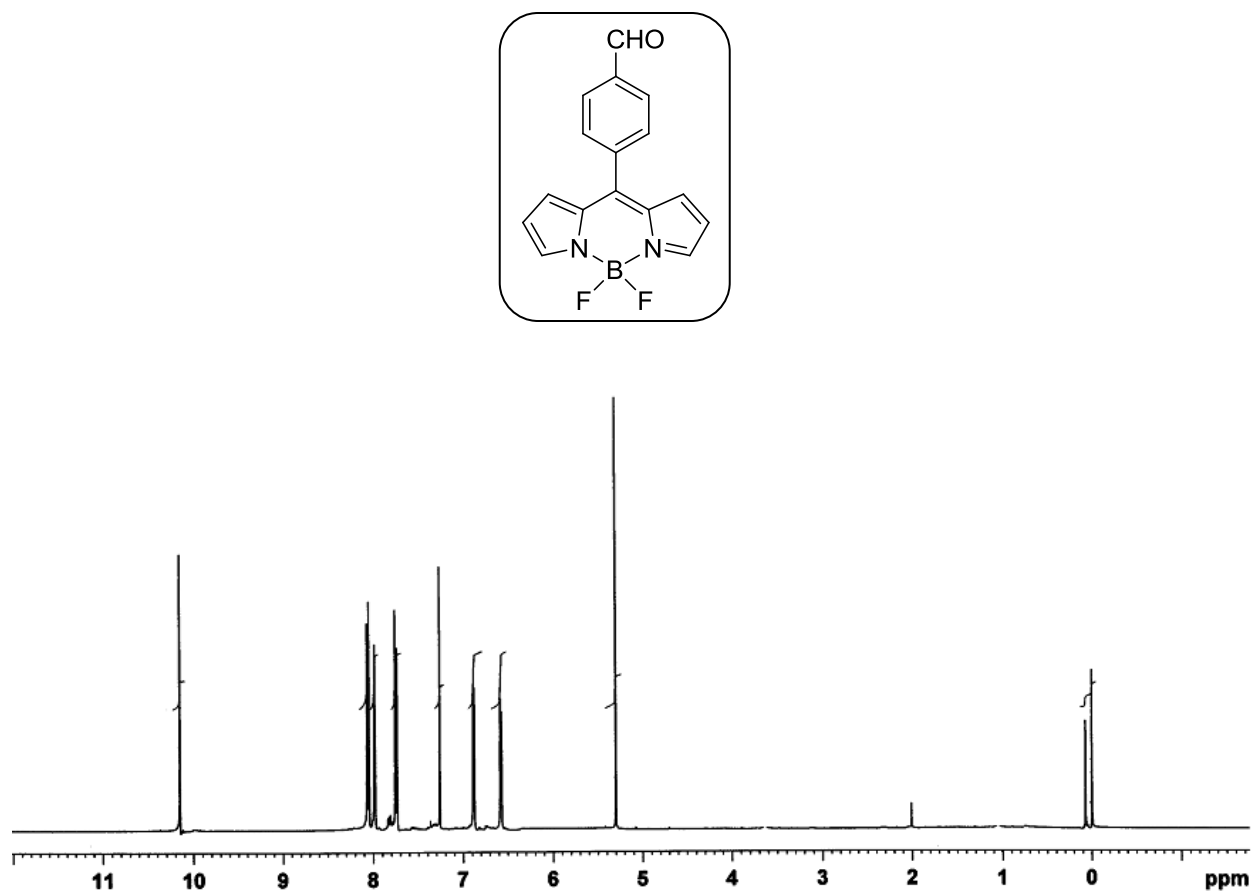

**Figure S9:**  $^1\text{H}$  NMR spectrum of compound **3** recorded in  $\text{CDCl}_3$

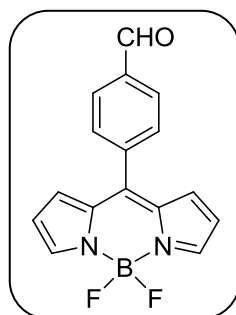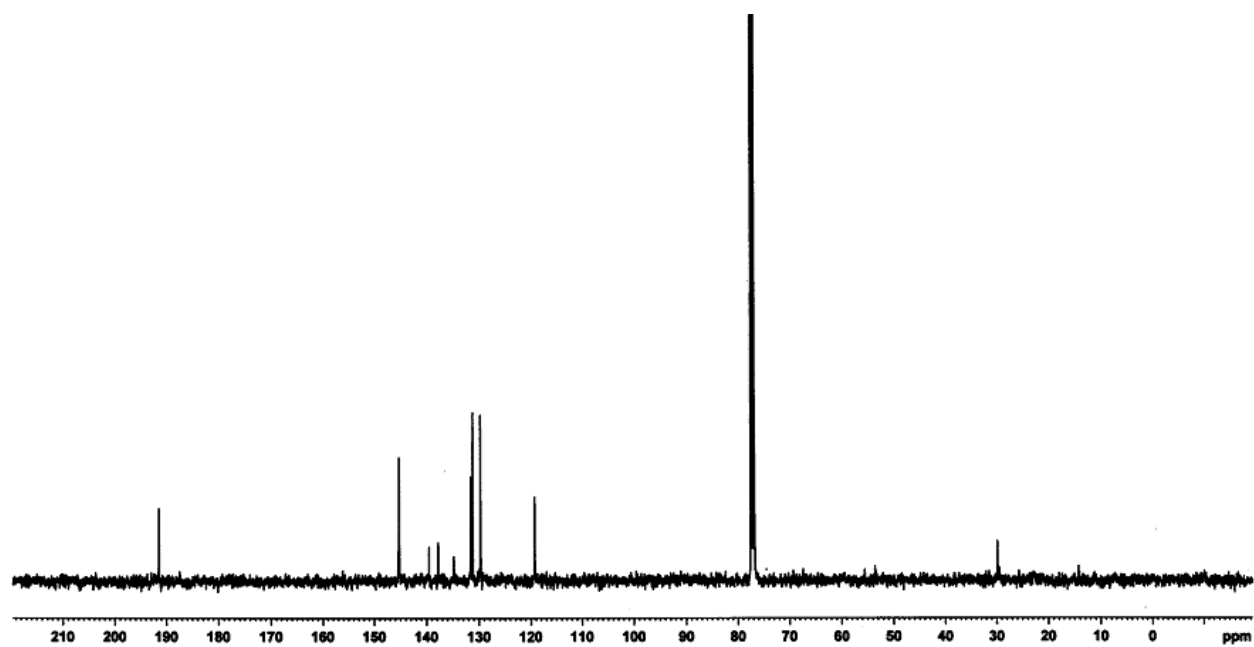

**Figure S10:**  $^{13}\text{C}$  NMR spectrum of compound **3** recorded in  $\text{CDCl}_3$

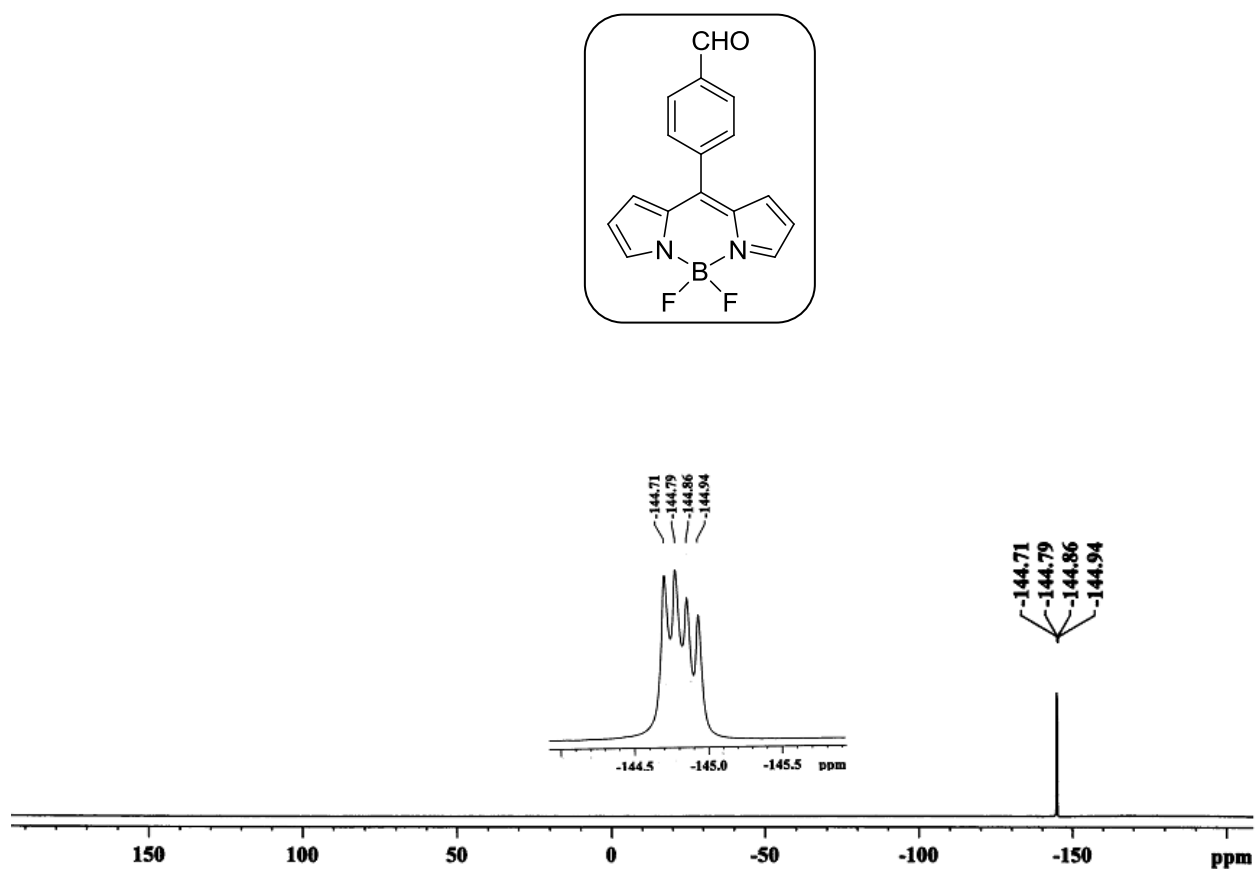

**Figure S11:**  $^{19}\text{F}$  NMR spectrum of compound **3** recorded in  $\text{CDCl}_3$ . Inset shows the expansion

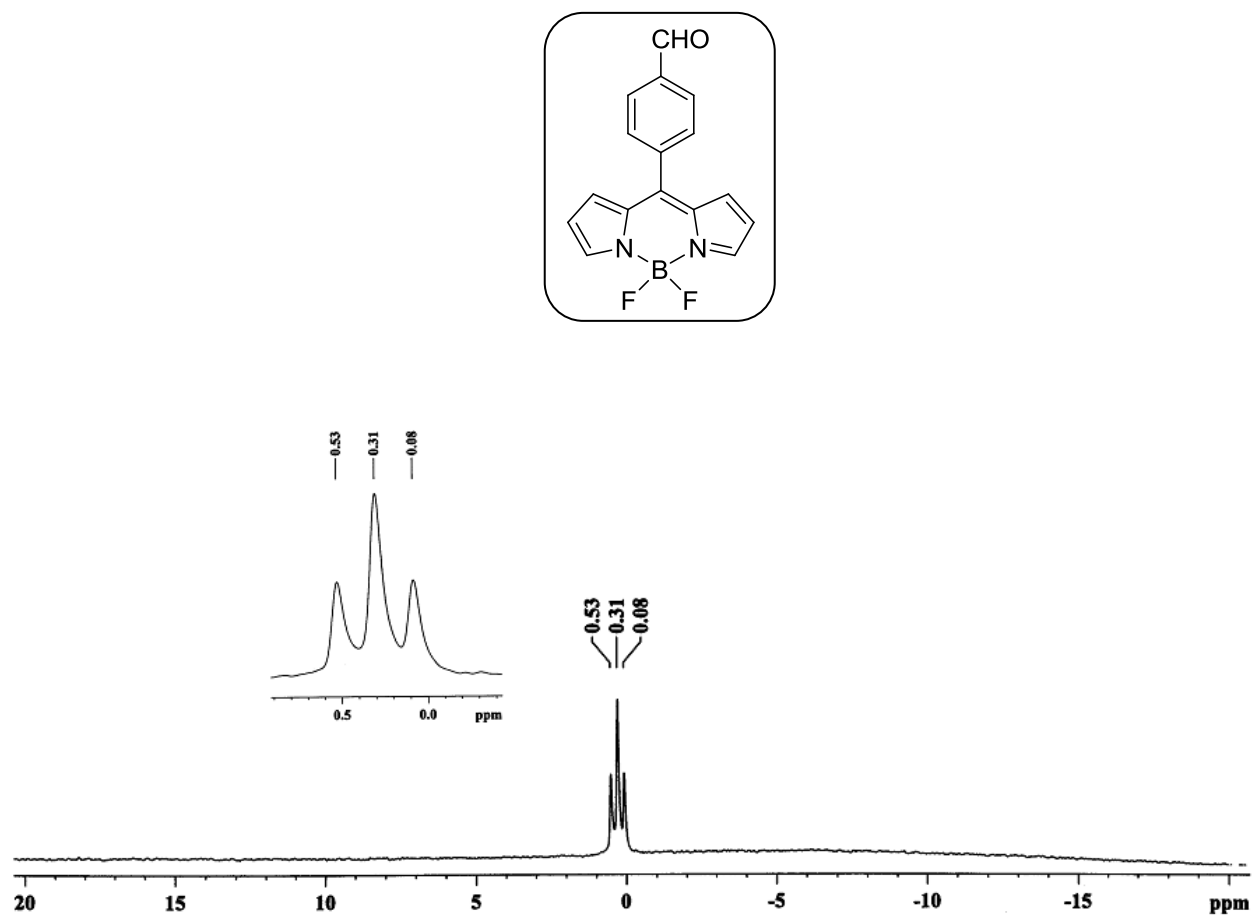

**Figure S12:**  $^{11}\text{B}$  NMR spectrum of compound 3 recorded in  $\text{CDCl}_3$ . Inset shows the expansion

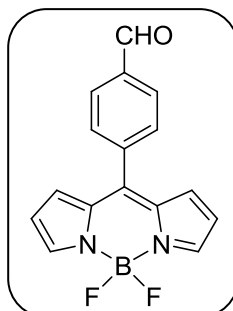

## Elemental Composition Report

Page 1

### Single Mass Analysis (displaying only valid results)

Tolerance = 50.0 PPM / DBE: min = -1.5, max = 200.0

Isotope cluster parameters: Separation = 1.0 Abundance = 1.0%

Monoisotopic Mass, Odd and Even Electron Ions

18 formula(e) evaluated with 1 results within limits (up to 50 closest results for each mass)

Waters(Micromass) : Q-ToF micro(YA-105)

Dept. Of Chemistry - I.I.T.(B)

11-Aug-201220:49:00

C16H11BF2N2O

MRK-SM-CHOBDP 29 (0.288) AM (Cen,5, 80.00, Ar,5000.0,556.28,1.00); Cm (6:36)

TOF MS ES+  
3.17e4

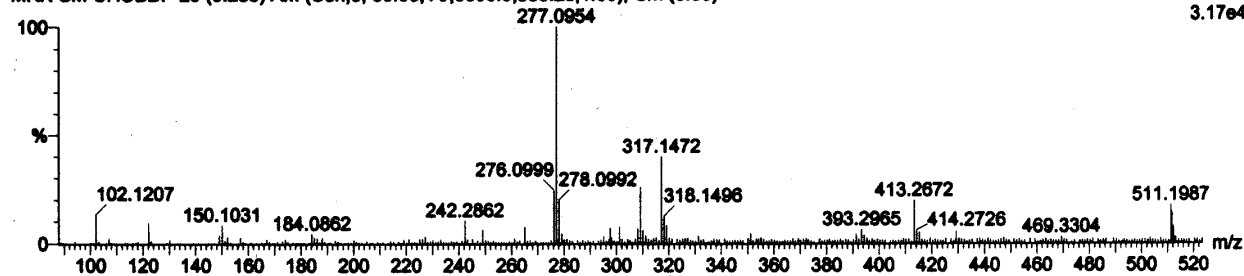

Minimum:

Maximum: 200.0 50.0 -1.5 200.0

| Mass     | Calc. Mass | mDa | PPM | DBE  | Score | Formula          |
|----------|------------|-----|-----|------|-------|------------------|
| 277.0954 | 277.0948   | 0.5 | 1.9 | 12.5 | 1     | C16 H11 B N2 O F |

Figure S13: HRMS spectrum of compound 3

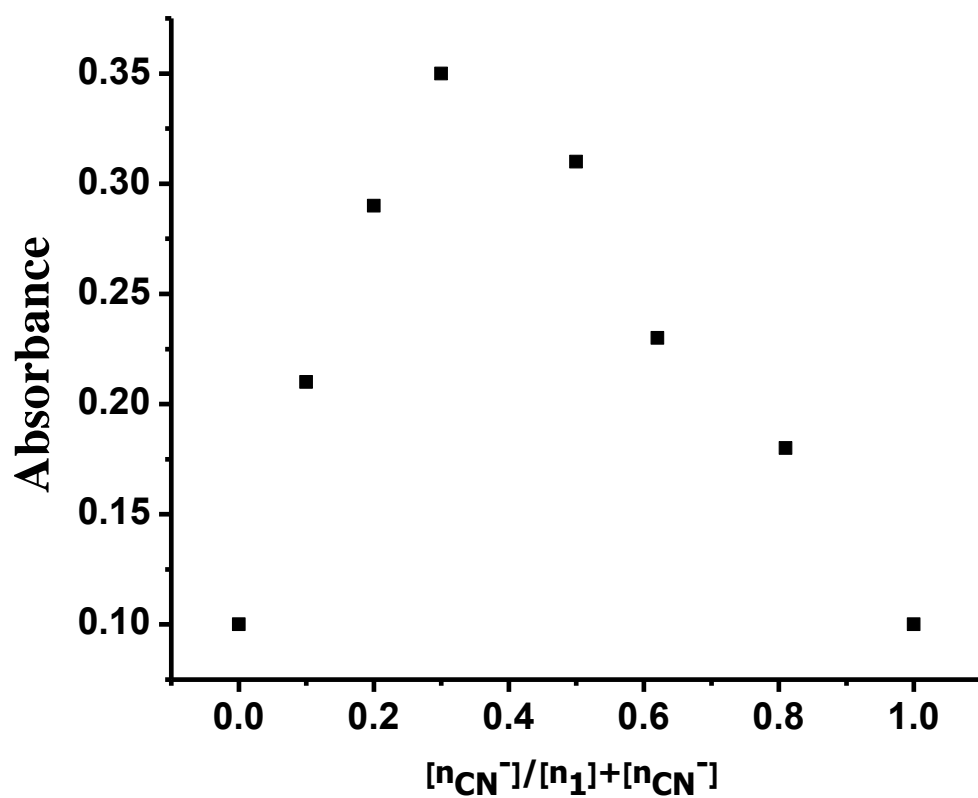

**Figure S14:** Job's plot for the **1** with  $\text{CN}^-$ . Where  $\text{n}_{\text{CN}^-}$ ,  $\text{n}_1$  are mole fractions of  $\text{CN}^-$  and **1** respectively which forms 1:2 complex.

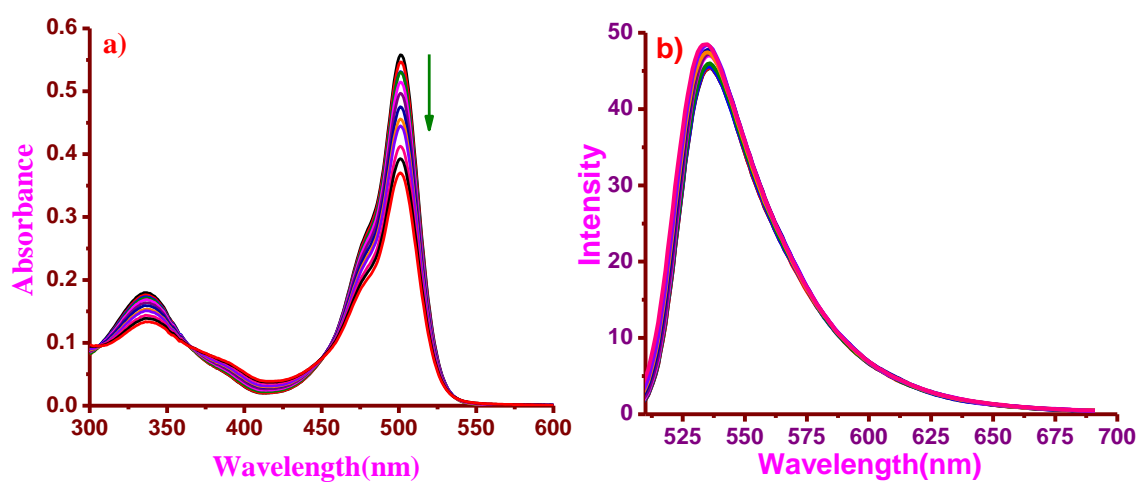

**Figure S15:** a) Absorption b) Emission spectra of compound **3** ( $5 \times 10^{-6}$  M) upon titration with different conc. of  $\text{CN}^-$  (TBACN) solution (0-50 equiv.) in  $\text{CH}_3\text{CN}$ .



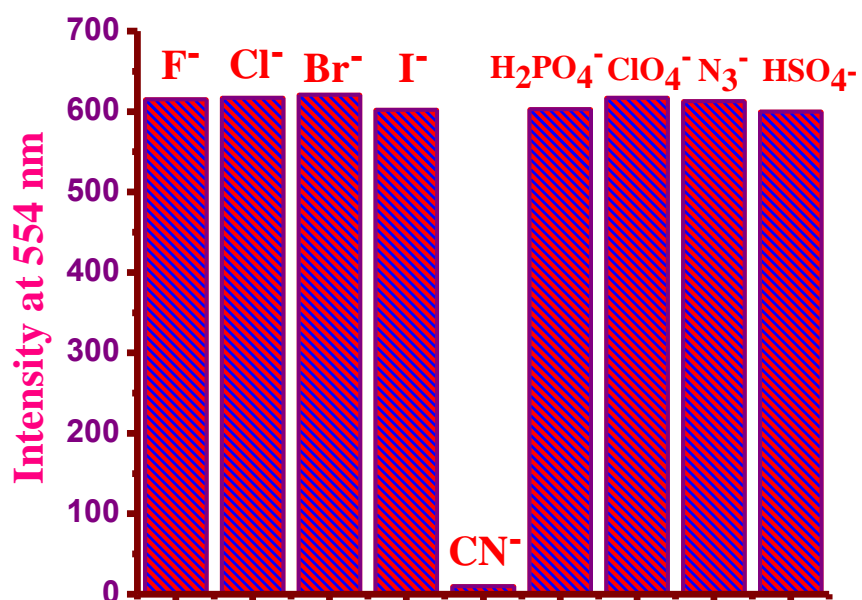

**Figure S16:** Histogram showing the changes in fluorescence intensity of compound **1** upon addition of various anions (excess of equivalents).

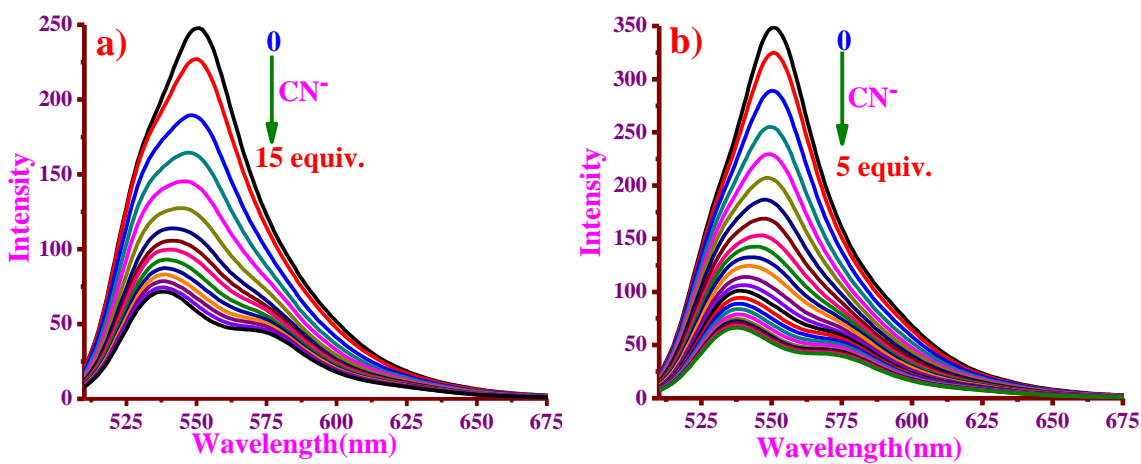

**Figure S17:** Emission spectra of compound **1** (5x10<sup>-6</sup> M), a) upon titration with different conc. of CN<sup>-</sup> (TBACN) solution (0-15 equiv.) in (CH<sub>3</sub>CN:H<sub>2</sub>O; 97:3 v/v), b) upon titration with different conc. of CN<sup>-</sup> (TBACN) solution (0-5 equiv.) in (CH<sub>3</sub>CN:H<sub>2</sub>O; 99:1 v/v).
